# Supplementary material
Source: HighWire-hosted journal article supplement (https://bjo.bmj.com/content/107/10/1452)
Supplement: inline-supplementary-material-1 [file inline-supplementary-material-1.pdf]

**Additional Tables for Within Trial Economic Evaluation Paper****Table A1: Unit costs for hospital appointments**

| Hospital Appointments         |        |                 |                                    |                                               |
|-------------------------------|--------|-----------------|------------------------------------|-----------------------------------------------|
| Item                          | £      | Unit            | Reference                          | Notes                                         |
| <b>Inpatient</b>              | 448    | Per night       | National Reference Costs 2017/2018 | Ward costs per night                          |
| <b>Outpatient appointment</b> | 105.09 | Per appointment | National Reference Costs 2017/2018 | Consultant led Ophthalmology outpatient costs |

**Table A2: Unit costs for glaucoma procedures**

| Ophthalmic Procedure                          | Source                             | HRG Code | Unit Cost | Comments                                                        |
|-----------------------------------------------|------------------------------------|----------|-----------|-----------------------------------------------------------------|
| Trabeculectomy (Day Case)                     | National Reference Costs 2017/2018 | BZ92B    | 1639.44   | Very Major, Glaucoma or Iris Procedures, with CC Score 0-1      |
| Trabeculectomy (Inpatient)                    | National Reference Costs 2017/2018 | BZ92B    | 2184.07   | Very Major, Glaucoma or Iris Procedures, with CC Score 0-1      |
| Massage                                       | National Reference Costs 2017/2018 | BZ24G    | 143.29    | Minor, Glaucoma or Iris Procedures                              |
| Adjustment / suturelysis / releasable release | National Reference Costs 2017/2018 | BZ95     | 143.29    | Minor, Glaucoma or Iris Procedures                              |
| 5-FU injection                                | National Reference Costs 2017/2018 | BZ95Z    | 149.69    | Minor, Glaucoma or Iris Procedures + Unit Costs of Fluorouracil |
| Steroid Injections                            | National Reference Costs 2017/2018 | BZ95Z    | 150.16    | Minor, Glaucoma or Iris Procedure + Unit Prednisolone           |
| Needling + 5-FU injection                     | National Reference Costs 2017/2018 | BZ94B    | 149.69    | Minor, Glaucoma or Iris Procedures + Unit Costs of Fluorouracil |
| Revision of bleb NEC                          | National Reference Costs 2017/2018 | BZ91B    | 1347.56   | Complex, Glaucoma or Iris Procedures, with CC Score 0-1         |
| Reformation of anterior chamber of eye        | National Reference Costs 2017/2018 | BZ94B    | 127.90    | Intermediate, Glaucoma or Iris Procedures, with CC Score 0      |
| Phaco and IOL                                 | National Reference Costs 2017/2018 | BZ32B    | 878.61    | Intermediate, Cataract or Lens Procedures, with CC Score 0-1    |

**Table A3: Unit costs for glaucoma medications**

| Medication                          | Dose | Administration | Unit cost (£) | Source | Comments |
|-------------------------------------|------|----------------|---------------|--------|----------|
| <b>Prostaglandin Analogues (PA)</b> |      |                |               |        |          |

| Medication                                 | Dose                     | Administration               | Unit cost (£) | Source               | Comments                          |
|--------------------------------------------|--------------------------|------------------------------|---------------|----------------------|-----------------------------------|
| Saftutan                                   | 15<br>micrograms/m<br>1  | Single dose unit eye<br>drop | 12.20         | BNF 2018<br>(Online) | Overall costs per box             |
| Latanoprost                                | 50<br>micrograms/m<br>1  | Eye drop                     | 1.53          | BNF 2018<br>(Online) | Overall costs per 2.5ml<br>bottle |
| Bimatoprost                                | 300<br>micrograms/m<br>1 | Eye drop                     | 10.30         | BNF 2018<br>(Online) | Overall costs per 3ml bottle,     |
| Travoprost                                 | 40<br>micrograms/m<br>1  | Eye drop                     | 7.27          | BNF 2018<br>(Online) | Overall costs per 2.5ml           |
| <b>Average Cost PA</b>                     |                          |                              | <b>7.83</b>   |                      |                                   |
| <b>Carbonic Anhydrase Inhibitors (CAI)</b> |                          |                              |               |                      |                                   |
| Brinzolamide                               | 10mg/ml                  | Eye drop                     | 1.89          | BNF 2018<br>(Online) | Overall costs per 5ml bottle      |
| Dorzolamide                                | 20mg/ml                  | Eye drop                     | 1.55          | BNF 2018<br>(Online) | Overall costs per 5ml bottle      |
| <b>Average Cost CAI</b>                    |                          |                              | <b>1.72</b>   |                      |                                   |
| <b>Alpha-2 Adrenergic Agonists (AA)</b>    |                          |                              |               |                      |                                   |
| Brimonidine                                | 0.2%                     | Eye drop                     | 1.13          | BNF 2018<br>(Online) | Overall costs per 5ml bottle      |
| Iopidine                                   | 5mg/ml                   | Eye drop                     | 10.88         | BNF 2018<br>(Online) | Overall costs per 5ml bottle      |
| <b>Average Cost of<br/>AA</b>              |                          |                              | <b>6.01</b>   |                      |                                   |
| <b>Beta Blockers (BB)</b>                  |                          |                              |               |                      |                                   |
| Timolol                                    | 0.25%                    | Eye drop                     | 0.78          | BNF 2018<br>(Online) | Overall costs per 5ml bottle      |
| Betoptic                                   | 0.5%                     | Eye drop                     | 1.90          | BNF 2018<br>(Online) | Overall costs per 5ml bottle      |
| <b>Average Cost of<br/>BB</b>              |                          |                              | <b>1.34</b>   |                      |                                   |
| <b>Parasympathetic Drops (Para)</b>        |                          |                              |               |                      |                                   |
| Pilocarpine<br>hydrochloride               | 1%                       | Eye drop                     | 20.78         | BNF 2018<br>(Online) | Overall costs per 10ml bottle     |
| <b>Average Cost of<br/>Para</b>            |                          |                              | <b>20.78</b>  |                      |                                   |
| <b>Oral Glaucoma Medications</b>           |                          |                              |               |                      |                                   |

| Medication                                                           | Dose                                                                                                                             | Administration            | Unit cost (£) | Source            | Comments                    |
|----------------------------------------------------------------------|----------------------------------------------------------------------------------------------------------------------------------|---------------------------|---------------|-------------------|-----------------------------|
| Acetazolamide                                                        | 250mg                                                                                                                            | Tablet                    | 16.66         | BNF 2018 (Online) | Overall cost per box (30)   |
| <b>Combination Glaucoma Medications (comb)</b>                       |                                                                                                                                  |                           |               |                   |                             |
| Bimatoprost with timolol (AZARGA)                                    | 10mg/ml                                                                                                                          | Eye drops                 | 11.05         | BNF 2018 (Online) | Overall cost per 5ml bottle |
| Bimatoprost with timolol (Ganfort)                                   | 5mg/m                                                                                                                            | Eye drops                 | 14.16         | BNF 2018 (Online) | Overall cost per 3ml bottle |
| Brinzolamide with brimonidine (Simbrinza)                            | 2mg/ml                                                                                                                           | Eye drops                 | 9.23          | BNF 2018 (Online) | Overall cost per 5ml bottle |
| Dorzolamide with timolol (Cosopt)                                    | 5mg/ml                                                                                                                           | Eye drops                 | 1.50          | BNF 2018 (Online) | Overall cost per 5ml bottle |
| Dorzolamide with timolol unit dose (Cosopt)                          | 5mg/ml                                                                                                                           | Single dose unit eye drop | 28.59         | BNF 2018 (Online) | Unit Dose,60 doses          |
| Dorzolamide with timolol (Eylamdo)                                   | 5mg/ml                                                                                                                           | Eye drop                  | 14.29         | BNF 2018 (Online) | Overall cost per 5ml bottle |
| Travoprost with timolol (DuoTrav)                                    | 5mg/ml                                                                                                                           | Eye drop                  | 13.95         | BNF 2018 (Online) | Overall cost per 5ml bottle |
| <b>Average Cost of Comb</b>                                          |                                                                                                                                  |                           | <b>13.25</b>  |                   |                             |
| <b>Non-Glaucoma Medications</b>                                      |                                                                                                                                  |                           |               |                   |                             |
| <b>Steroid Eye Drops</b>                                             |                                                                                                                                  |                           |               |                   |                             |
| Dexamethasone with hypromellose, neomycin and polymyxin B (Maxitrol) | Dexamethasone 1 mg per 1 gram<br>Neomycin (as Neomycin sulfate) 3500 unit per 1 gram<br>Polymyxin B sulfate 6000 unit per 1 gram | Eye drop                  | 1.68          | BNF 2018 (Online) | Overall cost per 5ml bottle |
| Betamethasone sodium phosphate                                       | 1 mg per 1 ml                                                                                                                    | Eye drop                  | 2.32          | BNF 2018 (Online) | Overall cost per 5ml bottle |
| Dexamethasone (Maxidex)                                              | 1 mg per 1 ml                                                                                                                    | Eye drop                  | 1.42          | BNF 2018 (Online) | Overall cost per 5ml bottle |
| Prednisolone (Pred Forte)                                            | 10 mg per 1 ml                                                                                                                   | Eye drop                  | 1.82          | BNF 2018 (Online) | Overall cost per 5ml bottle |

| Medication                                | Dose                   | Administration            | Unit cost (£) | Source            | Comments                     |
|-------------------------------------------|------------------------|---------------------------|---------------|-------------------|------------------------------|
| <b>Antibiotic Eye Drops</b>               |                        |                           |               |                   |                              |
| Azithromycin (azyter)                     | 15 mg per 1 gram       | Eye drop                  | 1.17          | BNF 2018 (Online) | Unit Dose, 6 doses           |
| Chloramphenicol                           | 5 mg per 1 ml          | Eye drop                  | 1.14          | BNF 2018 (Online) | Overall cost per 10ml bottle |
| Celluvisc Unit Dose                       | 1%                     | Single dose unit eye drop | 4.80          | BNF 2018 (Online) | Unit dose, 30 doses          |
| Hylo-Forte unit dose                      | 0.2%                   | Single dose unit eye drop | 5.60          | BNF 2018 (Online) | Unit dose, 30 doses          |
| Sodium hyaluronate (Vismed Multi)         | 0.18%                  | Eye drop                  | 6.87          | BNF 2018 (Online) | Overall cost per 10ml bottle |
| <b>Mydriatics</b>                         |                        |                           |               |                   |                              |
| Cyclopentolate (Mydrilate)                | 5 mg per 1 ml          | Eye drops                 | 8.08          | BNF 2018 (Online) | Overall Cost per 5ml bottle  |
| Atropine                                  | 10 mg per 1 ml         | Eye drops                 | 15.10         | BNF 2018 (Online) | Unit Dose, 20 doses          |
| <b>NSAID</b>                              |                        |                           |               |                   |                              |
| Bromfenac (Yellox)                        | 900 microgram per 1 ml | Eye drops                 | 8.50          | BNF 2018 (Online) | Overall cost per 5ml bottle  |
| <b>Sympathomimetic</b>                    |                        |                           |               |                   |                              |
| Phenylephrine                             | 50 microgram per 1 ml  | Eye drops                 | 11.87         | BNF 2018 (Online) | Unit Dose, 20 doses          |
| <b>Average Cost of Non Glaucoma Drops</b> |                        |                           | 7.27          |                   |                              |

**Table A4: Unit costs for community appointments**

| Item                        | Unit                          | £     | Comments                                                                                                                                                   |
|-----------------------------|-------------------------------|-------|------------------------------------------------------------------------------------------------------------------------------------------------------------|
| <b>GP</b>                   |                               |       |                                                                                                                                                            |
| GP visit at their practice  | Per 9.22 minute appointment   | 37    | <b>PSSRU 2018</b>                                                                                                                                          |
| GP home visit               | 11.4 minute Per appointment   | 45.98 | <b>PSSRU 2015 (most recent info)</b><br>11.4 minutes (2015 Health and Social Care) x 2017 hourly rate (£242) (no travel costs)                             |
| Telephone triage with GP    | Cost per call                 | 8.10  | <b>PSSRU 2017 (most recent info)</b><br>15.5 minutes x2015 hourly rate (£67) (not including travel)                                                        |
| <b>Nurse</b>                |                               |       |                                                                                                                                                            |
| Practice Nurse consultation | 15.5 minutes per consultation | 10.84 | <b>PSSRU 2018</b><br>15.5 minutes (length of appointment Unit Costs 2015) x 2017 hourly rate (£42)                                                         |
| District Nurse              | 25 minutes per consultation   | 17.29 | <b>PSSRU 2017</b><br>15.5 minutes x2015 hourly rate (£67) (not including travel)                                                                           |
| <b>Optician</b>             |                               |       |                                                                                                                                                            |
| Optometrist in practice     | Per examination               | 21.31 | <b>Department of Health and Social Care</b><br>Eye exam fee (As participants have glaucoma all will be entitled to NHS eye examinations)                   |
| Optometrist at home         | Per examination               | 58.87 | <b>Department of Health and Social Care</b><br>Eye exam fee + domiciliary fee (As participants have glaucoma all will be entitled to NHS eye examinations) |

**Table A5. Costs for different resources in each arm.**

| Resource                            | Total cost (£) in the Trabeculectomy |        |                    | Total cost (£) in the Medical management |        |                    |
|-------------------------------------|--------------------------------------|--------|--------------------|------------------------------------------|--------|--------------------|
|                                     | Mean                                 | Median | Standard Deviation | Mean                                     | Median | Standard Deviation |
| GP Surgery consultations            | 26                                   | 0      | 103                | 13                                       | 0      | 34                 |
| GP Home consultations               | 3                                    | 0      | 20                 | 2                                        | 0      | 18                 |
| GP telephone consultations          | 22                                   | 0      | 63                 | 32                                       | 0      | 97                 |
| Practice Nurse consultations        | 26                                   | 0      | 49                 | 45                                       | 0      | 128                |
| District Nurse consultations        | 10                                   | 0      | 81                 | 8                                        | 0      | 33                 |
| Optometrist consultations           | 29                                   | 21     | 38                 | 21                                       | 21     | 25                 |
| Ophthalmology consultations         | 1313                                 | 1129   | 615                | 593                                      | 407    | 524                |
| Other Consultations                 | 41                                   | 0      | 246                | 69                                       | 0      | 311                |
| Nights in Hospital                  | 28                                   | 0      | 166                | 10                                       | 0      | 78                 |
| Releasable release                  | 101                                  | 0      | 160                | 17                                       | 0      | 59                 |
| Ocular Massage                      | 97                                   | 0      | 192                | 5                                        | 0      | 30                 |
| Trabeculectomy                      | 1821                                 | 1639   | 850                | 394                                      | 0      | 800                |
| 5-Fluorouracil injection            | 30                                   | 0      | 95                 | 8                                        | 0      | 37                 |
| Steroid injection                   | 18                                   | 0      | 59                 | 6                                        | 0      | 44                 |
| Needling + 5-Fluorouracil injection | 37                                   | 0      | 99                 | 10                                       | 0      | 54                 |
| Bleb resuturing                     | 20                                   | 0      | 160                | 7                                        | 0      | 94                 |
| Anterior Chamber reformation        | 3                                    | 0      | 20                 | 1                                        | 0      | 9                  |
| Bleb revision                       | 45                                   | 0      | 242                | 7                                        | 0      | 94                 |
| Phacoemulsification                 | 63                                   | 0      | 309                | 81                                       | 0      | 374                |
| Prostaglandin Analogues             | 181                                  | 178    | 141                | 286                                      | 320    | 120                |
| Carbonic Anhydrase Inhibitor        | 7                                    | 0      | 15                 | 18                                       | 0      | 25                 |

|                |   |   |    |    |    |    |
|----------------|---|---|----|----|----|----|
| Beta Blockers  | 9 | 0 | 16 | 19 | 10 | 22 |
| Alpha Agonists | 5 | 0 | 19 | 15 | 0  | 50 |
| Pilocarpine    | 0 | 0 | 5  | 1  | 0  | 21 |
| Combinations   | 4 | 0 | 22 | 1  | 0  | 10 |
| Diamox         | 1 | 0 | 10 | 1  | 0  | 18 |
| Others         | 0 | 0 | 4  | 0  | 0  | 0  |

**Table A6. Data completion in each arm**

| Data response rates                  | Trial arm           |                         |
|--------------------------------------|---------------------|-------------------------|
|                                      | Trabeculectomy %(n) | Medical management %(n) |
| <b>Case Report Form</b>              |                     |                         |
| 4-months                             | 99% (226)           | 99% (223)               |
| 12-months                            | 99% (226)           | 100% (226)              |
| 24-months                            | 96% (217)           | 97% (219)               |
| <b>EQ-5D-5L</b>                      |                     |                         |
| Baseline                             | 98% (222)           | 98% (222)               |
| 1-month                              | 85% (194)           | 90% (203)               |
| 3-months                             | 82% (186)           | 79% (179)               |
| 6-months                             | 82% (186)           | 86% (195)               |
| 12-months                            | 93% (211)           | 92% (209)               |
| 18-months                            | 80% (181)           | 81% (184)               |
| 24-months                            | 91% (206)           | 90% (203)               |
| <b>Resource Use Questionnaire</b>    |                     |                         |
| 4-months                             | 93% (210)           | 96% (216)               |
| 12-months                            | 94% (213)           | 92% (208)               |
| 24-months                            | 92% (208)           | 90% (204)               |
| <b>Time and Travel Questionnaire</b> | 68% (154)           | 65% (148)               |

Table A7: Complete and MI HUI 3 Cost Utility Analysis Results

| HUI 3 Data                    | Intervention | Unadjusted | Adjusted                | Unadjusted | Adjusted            | ICER<br>( $\Delta$ Cost/<br>$\Delta$ QALY)<br>(£) | Probability cost-effective at threshold |         |         |         |
|-------------------------------|--------------|------------|-------------------------|------------|---------------------|---------------------------------------------------|-----------------------------------------|---------|---------|---------|
|                               |              | Cost (£)   | Incremental<br>Cost (£) | QALY       | Incremental<br>QALY |                                                   | £0                                      | £20,000 | £30,000 | £50,000 |
| Complete case<br>data (n=240) | Surgery      | 3819       | 2129                    | 1.61       | 0.06                | 33,758                                            | 0%                                      | 9%      | 38%     | 76%     |
|                               | Medication   | 1691       |                         | 1.54       |                     |                                                   | 100%                                    | 91%     | 62%     | 24%     |
| Imputation<br>data (n=382)    | Surgery      | 3688       | 2040                    | 1.54       | 0.06                | 36,130                                            | 0%                                      | 4%      | 32%     | 72%     |
|                               | Medication   | 1640       |                         | 1.48       |                     |                                                   | 100%                                    | 96%     | 68%     | 28%     |



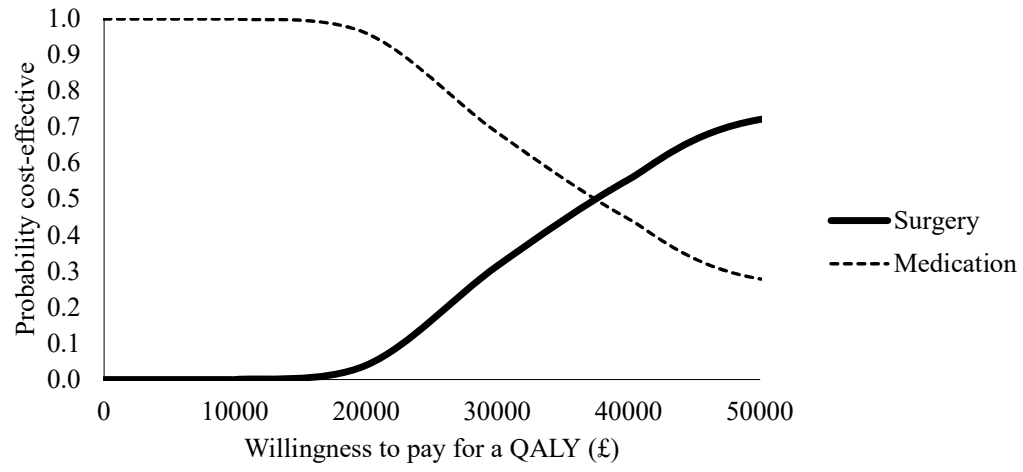

Figure A1: Cost effectiveness curves for the surgical and medical arms using the results from the imputed HUI3 sample

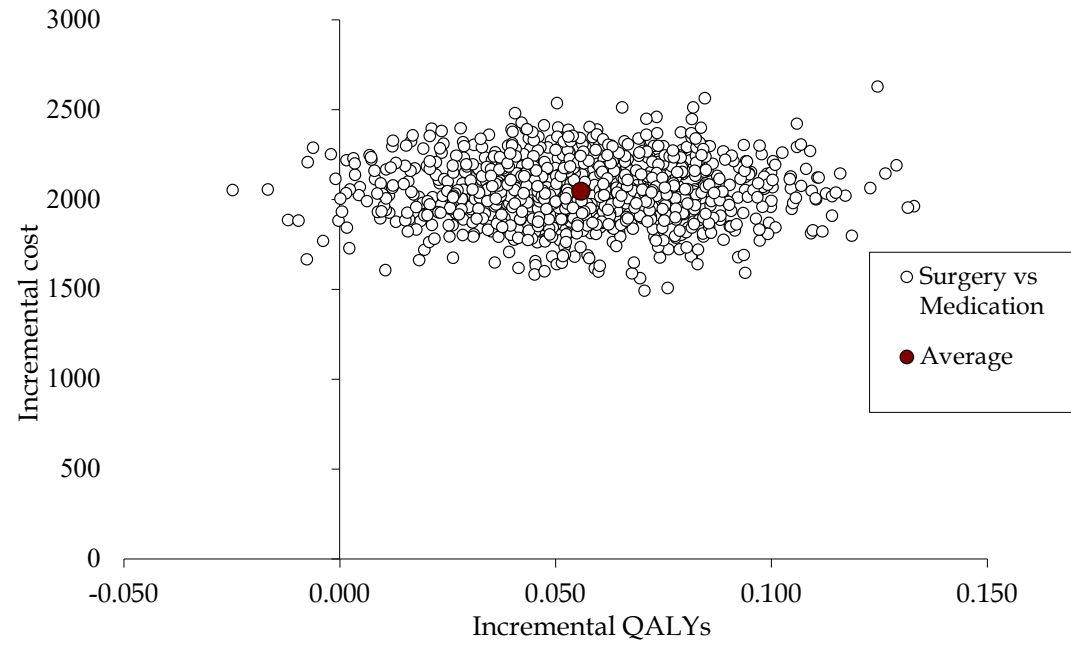

Figure A2: Cost effectiveness curves for the surgical and medical arms using the results from the imputed HUI3 sample

**Table A8: Complete and MI GUI Cost Utility Results**

| GUI Data                      | Intervention | Unadjusted<br>Cost (£) | Adjusted<br>Incremental<br>Cost (£) | Unadjusted<br>QALY | Adjusted<br>Incremental<br>QALY | ICER<br>( $\Delta$ Cost/ $\Delta$ QALY)<br>(£) | Probability cost-effective at threshold |         |         |         |
|-------------------------------|--------------|------------------------|-------------------------------------|--------------------|---------------------------------|------------------------------------------------|-----------------------------------------|---------|---------|---------|
|                               |              |                        |                                     |                    |                                 |                                                | £0                                      | £20,000 | £30,000 | £50,000 |
| Complete case<br>data (n=293) | Surgery      | 3683                   | 2138                                | 1.67               | 0.01*                           | 111,117                                        | 0%                                      | 9%      | 38%     | 76%     |
|                               | Medication   | 1541                   |                                     | 1.64               |                                 |                                                | 100%                                    | 91%     | 62%     | 24%     |
| Imputation<br>data (n=398)    | Surgery      | 3617                   | 1995                                | 1.64               | 0.00                            | 350,149                                        | 0%                                      | 0%      | 0%      | 0%      |
|                               | Medication   | 1615                   |                                     | 1.62               |                                 |                                                | 100%                                    | 100%    | 100%    | 100%    |

\*Adjusted difference is in favour of medication in this instance not surgery.

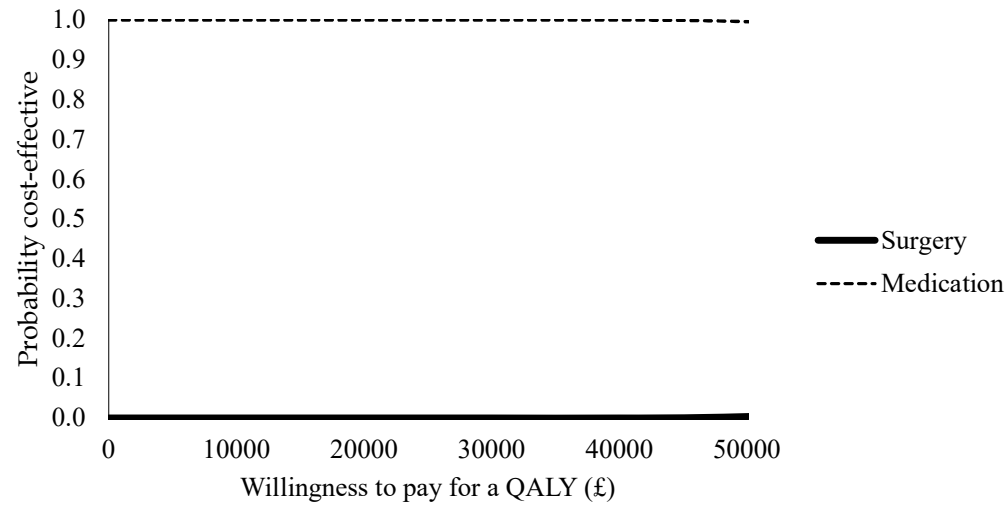

Figure A3: Cost effectiveness curves for the surgical and medical arms using the results from the imputed GUI sample

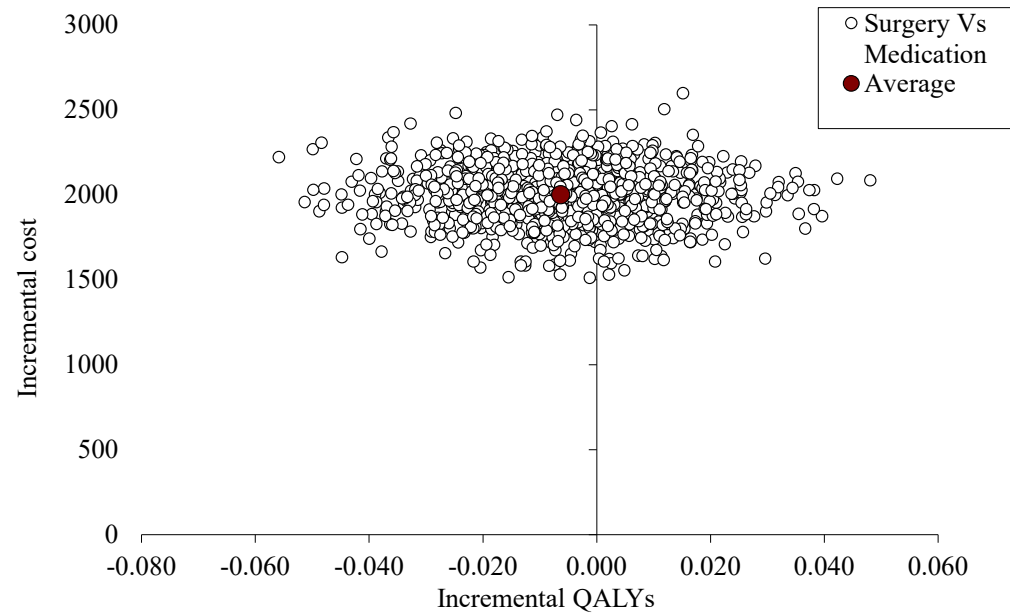

Figure A4: Cost effectiveness curves for the surgical and medical arms using the results from the imputed GUI sample

Table A9: EQ-5D-5L Data with patient time and travel costs included Cost Utility Results

| EQ-5D-5L<br>Data with<br>patient time<br>and travel<br>costs included | Intervention | Unadjusted<br>Cost with TT<br>(£) | Adjusted<br>Incremental<br>Cost (£) | Unadjusted<br>QALY | Adjusted<br>Incremental<br>QALY | ICER<br>( $\Delta$ Cost/<br>$\Delta$ QALY)<br>(£) | Probability cost-effective at threshold |         |         |         |
|-----------------------------------------------------------------------|--------------|-----------------------------------|-------------------------------------|--------------------|---------------------------------|---------------------------------------------------|-----------------------------------------|---------|---------|---------|
|                                                                       |              |                                   |                                     |                    |                                 |                                                   | £0                                      | £20,000 | £30,000 | £50,000 |
| Complete case<br>data (n=290)                                         | Surgery      | 4453                              | 2412                                | 1.65               | 0.03                            | 75,347                                            | 0%                                      | 1%      | 2%      | 25%     |
|                                                                       | Medication   | 2046                              |                                     | 1.59               |                                 |                                                   | 100%                                    | 99%     | 98%     | 75%     |
| Imputation<br>data (n=403)                                            | Surgery      | 4419                              | 2359                                | 1.61               | 0.04                            | 54,197                                            | 0%                                      | 1%      | 5%      | 42%     |
|                                                                       | Medication   | 2052                              |                                     | 1.56               |                                 |                                                   | 100%                                    | 99%     | 95%     | 58%     |

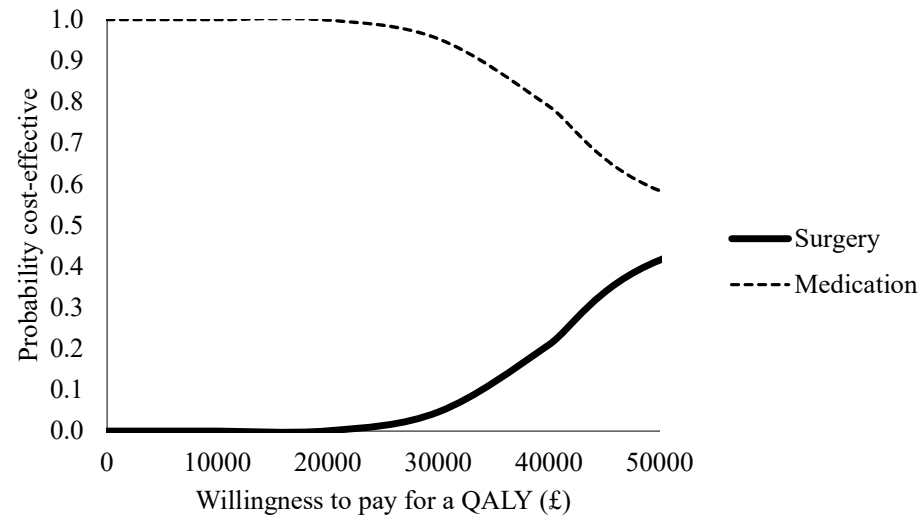

Figure A5: Cost effectiveness curves for the surgical and medical arms using the results from the imputed ED-5D-5L using the time and travel data

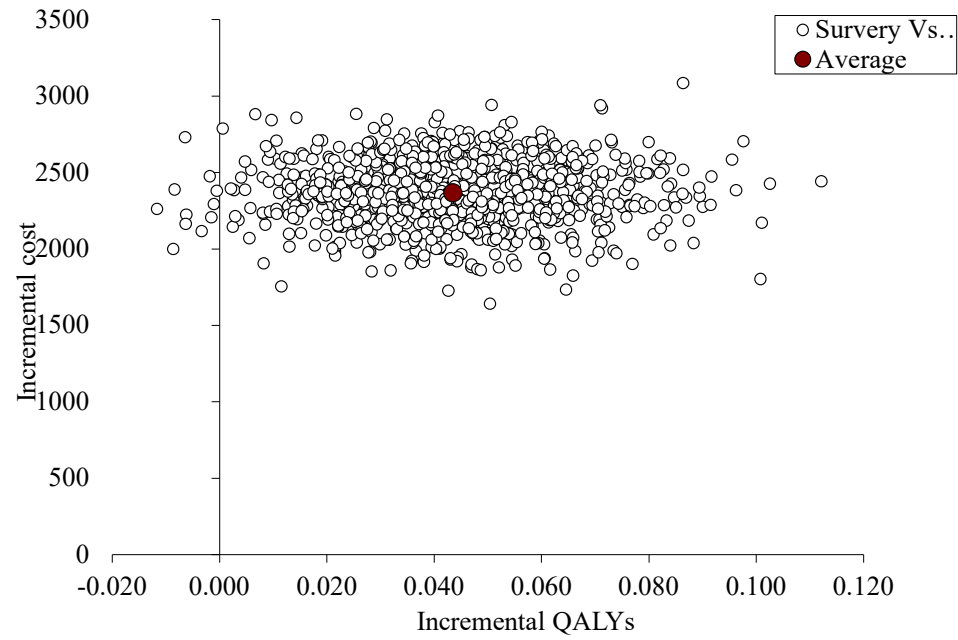

**Figure A6: Cost-effectiveness plane for adjusted bootstrapped replications for Cost-utility analysis from the imputed ED-5D-5L results with time and travel costs**
